# Supplementary material for: Characterization of coral-associated microbial aggregates (CAMAs) within tissues of the coral Acropora hyacinthus
Source: PubMed Central journal article supplement (PMC6787259; doi:10.1038/s41598-019-49651-7), 2019-10-10
Supplement: 41598_2019_49651_MOESM1_ESM.pdf [file 41598_2019_49651_MOESM1_ESM.pdf]

## Supplementary information

### Characterization of coral-associated microbial aggregates (CAMAs) within tissues of the coral *Acropora hyacinthus*

Naohisa Wada<sup>1,2,7</sup>, Mizuki Ishimochi<sup>2,3</sup>, Taeko Matsui<sup>2</sup>, F. Joseph Pollock<sup>4,7,8</sup>, Sen-Lin Tang<sup>1</sup>,  
Tracy D. Ainsworth<sup>5</sup>, Bette L. Willis<sup>6,7</sup>, Nobuhiro Mano<sup>2,†</sup>, David G. Bourne<sup>6,7,9,†</sup>

<sup>1</sup>Biodiversity Research Center, Academia Sinica, Nangang, Taipei 11529, Taiwan

<sup>2</sup>Department of Marine Science and Resources, College of Bioresource Science, Nihon University, Fujisawa, Kanagawa 252-0813, Japan

<sup>3</sup>Faculty of Science, University of the Ryukyus, Nishihara, Okinawa 903-0213, Japan

<sup>4</sup>The Nature Conservancy, Caribbean Division, Coral Gables, FL 33134

<sup>5</sup>School of Biological, Earth and Environmental Science, University of New South Wales, Sydney, NSW 2052, Australia

<sup>6</sup>College of Science and Engineering, James Cook University, Townsville, QLD 4811, Australia

<sup>7</sup>AIMS@JCU, Townsville, QLD 4811, Australia

<sup>8</sup>Department of Biology, The Pennsylvania State University, State College, PA 16802, USA

<sup>9</sup>Australian Institute of Marine Science, Townsville, QLD 4810, Australia

†Equal correspond authors

Dr. Nobuhiro Mano (mano.nobuhiro@nihon-u.ac.jp) Department of Marine Science and Resources, College of Bioresource Science, Nihon University, Fujisawa, Kanagawa, 252-0813 Japan. Phone +81 466 84 3357

Dr. David G. Bourne (david.bourne@jcu.edu.au) College of Science and Engineering, James Cook University, Townsville, QLD, 4811 Australia. Phone +61 7 47814790

**Suppl. table S1** Fisher's exact test values for the presence/absence of CAMA detected by HE stain and FISH among samples collected from the five sites

|                                   | Compared element            | p-value of Adj. Fisher exact test |
|-----------------------------------|-----------------------------|-----------------------------------|
| CAMAs detected by HE <sup>†</sup> | Sesoko Is. vs. Inner Shelf  | 0.6770                            |
|                                   | Sesoko Is. vs. Lizard Is.   | 0.0155**                          |
|                                   | Sesoko Is. vs. Outer Shelf  | 0.0151**                          |
|                                   | Sesoko Is. vs. Orpheus Is.  | 0.0360**                          |
|                                   | Inner Shelf vs. Lizard Is   | 0.1400                            |
|                                   | Inner Shelf vs. Outer Shelf | 0.1340                            |
|                                   | Inner Shelf vs. Orpheus Is. | 0.2830                            |
|                                   | Lizard Is. vs. Outer Shelf  | 1.0000                            |
|                                   | Lizard Is. vs. Orpheus Is.  | 1.0000                            |
|                                   | Outer Shelf vs. Orpheus Is. | 0.7980                            |
| CAMAs detected by FISH            | Sesoko Is. vs. Inner Shelf  | 1.00000                           |
|                                   | Sesoko Is. vs. Lizard Is.   | 0.00517***                        |
|                                   | Sesoko Is. vs. Outer Shelf  | 0.00378***                        |
|                                   | Sesoko Is. vs. Orpheus Is.  | 0.00357***                        |
|                                   | Inner Shelf vs. Lizard Is   | 0.00517***                        |
|                                   | Inner Shelf vs. Outer Shelf | 0.00378***                        |
|                                   | Inner Shelf vs. Orpheus Is. | 0.00357***                        |
|                                   | Lizard Is. vs. Outer Shelf  | 1.00000                           |
|                                   | Lizard Is. vs. Orpheus Is.  | 1.00000                           |
|                                   | Outer Shelf vs. Orpheus Is. | 1.00000                           |

<sup>†</sup>The HE stained CAMAs include basophilic and eosinophilic CAMAs.

P values are \*\* $p < 0.05$  and \*\*\* $p < 0.01$ .

**Suppl. table S2** Summary of the densities of CAMAs in HE- and FISH- stained tissues

|                                                    | Sesoko Is.   | Inner Shelf  | Lizard Is.  | Outer Shelf  | Orpheus Is. |
|----------------------------------------------------|--------------|--------------|-------------|--------------|-------------|
| Sample size                                        | 10           | 10           | 10          | 8            | 10          |
| <b>Basophilic CAMAs</b>                            |              |              |             |              |             |
| Colonies observed with CAMAs                       | 10           | 8            | 3           | 0            | 3           |
| Ave. densities (n/cm <sup>2</sup> ) in tissues     | 20.13±17.1   | 6.78±9.3     | 0.92±0.1    | -            | 3.55±3.3    |
| Density range (n/cm <sup>2</sup> ) across samples  | 1.06 - 48.90 | 0.86 - 25.48 | 0.87 - 1.02 | -            | 1.54 - 7.42 |
| <b>Eosinophilic CAMAs</b>                          |              |              |             |              |             |
| Colonies observed with CAMAs                       | 0            | 1            | 0           | 2            | 1           |
| Ave. densities (n/cm <sup>2</sup> ) in tissues     | -            | 0.86         | -           | 5.39±6.7     | 1.28±2.8    |
| Density range (n/cm <sup>2</sup> ) across samples  | -            | -            | -           | 0.69 - 10.10 |             |
| <b>FISH detected CAMAs</b>                         |              |              |             |              |             |
| Colonies observed with CAMAs                       | 10           | 10           | 3           | 2            | 2           |
| Ave. densities (n/cm <sup>2</sup> ) in tissues     | 18.72±12.7   | 7.90±8.2     | 1.26±0.6    | 0.90±0.5     | 4.48±4.2    |
| Density ranges (n/cm <sup>2</sup> ) across samples | 0.53 - 41.08 | 0.86 - 25.48 | 0.87 - 1.02 | 0.58 - 1.22  | 1.54 - 7.42 |

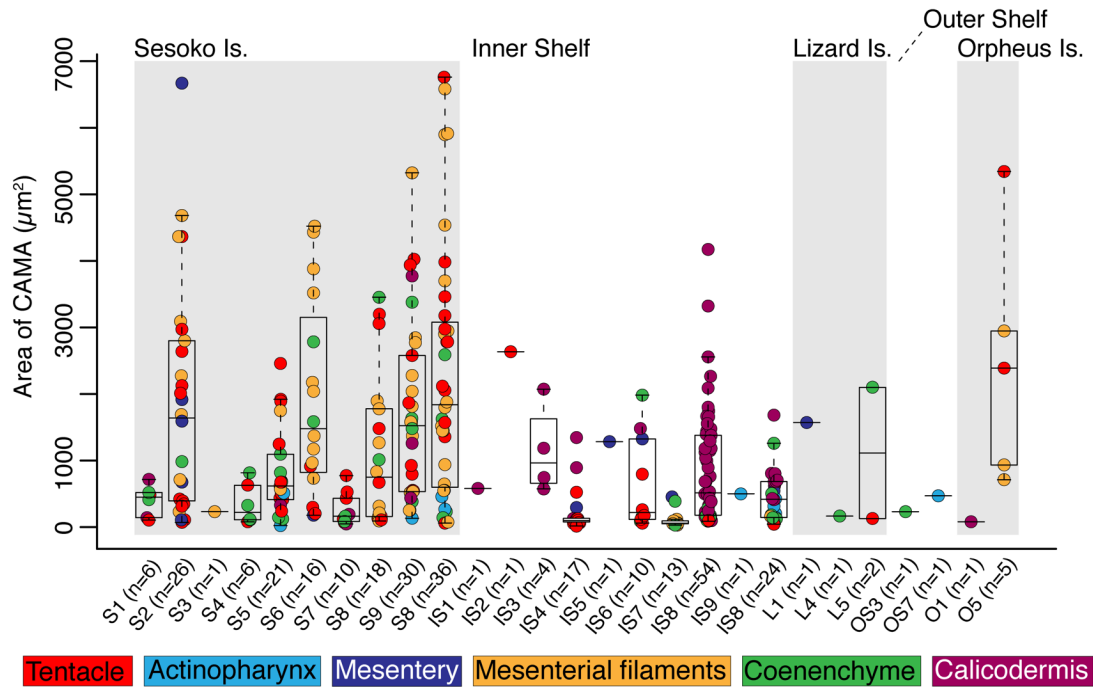

**Suppl. Fig. S1 High variation of CAMA size at the individual colony level.** Dot plots with box plots showing the size of CAMAs among six anatomical regions (see color coding in below index) for each site.

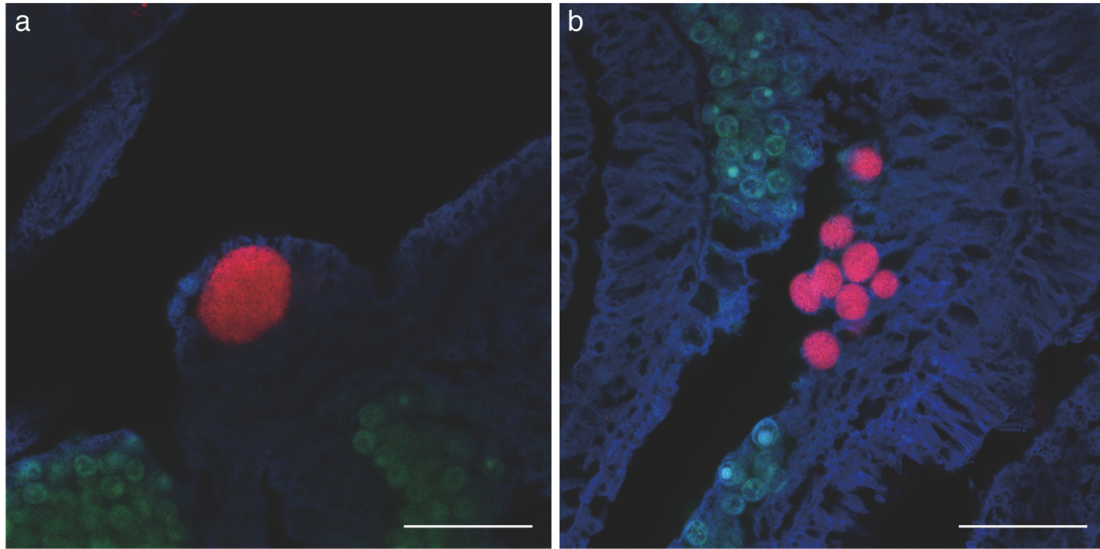

**Suppl. Fig. S2 Calculating the area of CAMAs.** (a) A single large CAMA, comprised of rod-shaped bacteria, was calculated to be  $175.7 \mu\text{m}^2$  in cross-sectional area from 3D images. (b) Smaller, numerous aggregations were calculated to be, on average,  $22.6 \pm 4.2 \mu\text{m}^2$  in cross-sectional area ( $n = 8$ ). Scale bars indicate  $50 \mu\text{m}$ .

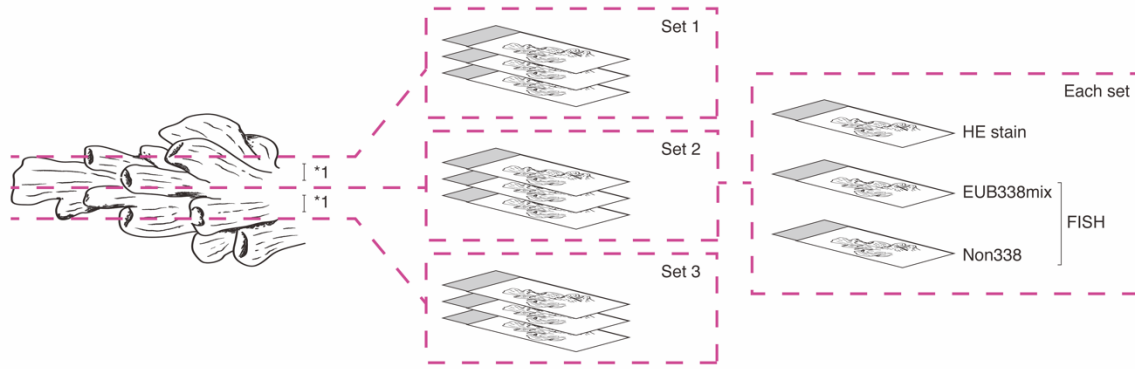

**Suppl. Fig. S3 Schematic drawing showing how coral fragments were sectioned for HE staining and FISH.** In total, nine sections were collected from each sample (three sets of sections, each set comprised of three serial sections). \*1: Distance between each set was 100  $\mu\text{m}$ .
